# Supplementary material for: Sensitivity of Proton NMR Relaxation and Proton NMR Diffusion Measurements to Olive Oil Adulterations with Vegetable Oils
Source: PubMed Central journal article supplement (PMC8532151; doi:10.1021/acs.jafc.1c00914), 2021-05-20
Supplement: jf1c00914_si_001.pdf [file jf1c00914_si_001.pdf]

# Sensitivity of **Proton** NMR Relaxation and **Proton** NMR Diffusion Measurements to Olive Oil Adulterations with Vegetable Oils

*Donatella Ancora<sup>1§</sup>, Jerneja Milavec<sup>2#</sup>, Anton Gradišek<sup>2\*</sup>, Mario Cifelli<sup>1</sup>,*

*Ana Sepe<sup>2</sup>, Tomaž Apih<sup>2</sup>, Boštjan Zalar<sup>2</sup> and Valentina Domenici<sup>1\*</sup>*

1. Dipartimento di Chimica e Chimica Industriale, Università di Pisa, via Moruzzi, 3 – 56124 Pisa  
(Italy);

2. Department of Condensed Matter Physics, Jožef Stefan Institute, 39 Jamova Cesta, SI-1000,  
Ljubljana (Slovenia).

<sup>§</sup> former student at Dipartimento di Chimica e Chimica Industriale.

<sup>#</sup> former Ph.D. student at Jozef Stefan Institute.

\* Corresponding authors.

E-mail: [valentina.domenici@unipi.it](mailto:valentina.domenici@unipi.it) & [anton.gradisek@ijs.si](mailto:anton.gradisek@ijs.si)

**SUPPORTING INFORMATION**

**Table S1:** List of oil samples investigated in this work. Producer, Geographical area, Cultivar, harvesting year and additional information are indicated for each sample, with the label and number used in the data analysis.

| Sample | Producer                                                 | Area                          | Cultivar                    | Year | Further information | Label for Figures |
|--------|----------------------------------------------------------|-------------------------------|-----------------------------|------|---------------------|-------------------|
| at_1   | Agriturismo<br>Pane&Vino                                 | Gabbro (LI)                   | Blend                       | 2012 | biologic oil        | 1                 |
|        |                                                          | Castelnuovo                   |                             |      |                     | 2                 |
| at_2   | Agriturismo<br>Cappellese                                | della<br>Misericordia<br>(LI) | Frantoio, Leccino, Moraiolo | 2012 | biologic oil        |                   |
| at_3   | Azienda<br>Agrituristica<br>Casolar de No'<br>altri      | Larciano (PT)                 | Blend                       | 2010 | biologic oil        | 3                 |
| at_4   | Azienda<br>Orzalesi                                      | Rosignano<br>Marittimo (LI)   | Frantoio, Leccino, Moraiolo | 2012 |                     | 4                 |
| at_5   | Azienda<br>Agricola "Le<br>Ceppite"                      | Rosignano<br>Marittimo (LI)   | Frantoio, Leccino, Moraiolo | 2012 |                     | 5                 |
| at_6   | Azienda<br>Agricola<br>"Antica Fonte"                    | Rosignano<br>Marittimo (LI)   | Frantoio, Leccino, Moraiolo | 2012 |                     | 6                 |
| at_7   | Azienda<br>Agricola<br>"Esposito<br>Susanna et<br>Atria" | Bibbona (LI)                  | Frantoio, Leccino, Moraiolo | 2012 |                     | 7                 |

|               |                                            |                            |                             |      |              |    |
|---------------|--------------------------------------------|----------------------------|-----------------------------|------|--------------|----|
| <b>at_8</b>   | Franci<br>Frantoio IGP                     | Montenero<br>D'orcia       | Frantoio, Leccino, Moraiolo | 2012 |              | 8  |
| <b>at_9</b>   | Oliveto Fonte<br>di Foiano                 | Castagneto<br>Carducci     | Frantoio, Leccino, Moraiolo | 2012 |              | 9  |
| <b>at_10</b>  | Azienda<br>Agricola<br>Giovani             | San Lorenzo,<br>Suvereto   | Frantoio, Leccino, Moraiolo | 2012 |              | 10 |
| <b>at_11b</b> | Tenuta "La<br>Pineta"                      | Catiglion<br>Fibocchi (AR) | Frantoio, Leccino, Moraiolo | 2012 | Filtered oil | 11 |
| <b>at_12</b>  | Tenuta<br>"S.Jacopo"                       | Cavriglia (AR)             | Frantoio, Leccino, Moraiolo | 2012 |              | 12 |
| <b>at_13</b>  | Azienda<br>Agricola<br>Cristiana<br>Ruschi | Calci (PI)                 | Frantoio, Leccino, Moraiolo | 2012 |              | 13 |
| <b>at_14</b>  | Azienda<br>Mannucci<br>Doandri DOP         | Ceppeto (AR)               | Blend                       | 2011 |              | 14 |
| <b>at_15</b>  | Azienda "La<br>Salceta"                    | Lorociuffenna<br>(AR)      | Frantoio, Leccino, Moraiolo | 2012 |              | 15 |
| <b>at_16c</b> | Tenuta<br>"Montefoscoli<br>"               | Palaia (PI)                | Frantoio, Leccino, Moraiolo | 2012 | Biologic oil | 16 |
| <b>at_18</b>  | Azienda Terzi<br>di Monte<br>Oliveto       | Asciano (SI)               | Blend                       |      | Biologic oil | 17 |
| <b>at_19</b>  | Frantoio<br>Loziro                         | Murlo (SI)                 | Frantoio, Leccino, Moraiolo |      |              | 18 |

|              |                            |                              |                             |      |              |    |
|--------------|----------------------------|------------------------------|-----------------------------|------|--------------|----|
| <b>at_20</b> | Azienda Agricola Carraia   | Podere Carraia, Petroio (SI) | Blend                       | 2012 |              | 19 |
| <b>at_21</b> | Tenuta Montalto            | San Miniato (PI)             | Frantoio, Leccino, Moraiolo | 2012 |              | 20 |
| <b>at_22</b> | Cosimo Maria Masina        | San Miniato (PI)             | Mignola                     | 2012 | Monocultivar | 21 |
| <b>at_23</b> | Tenuta San Quintino        | San Miniato (PI)             | Frantoio, Leccino, Moraiolo | 2012 |              | 22 |
| <b>at_24</b> | Azienda Olearea Chianti    | Greve (FI)                   | Frantoio, Leccino, Moraiolo | 2011 |              | 23 |
| <b>at_25</b> | Azienda Agricola Donati    | Casale Marittimo (PI)        | Frantoio, Leccino, Moraiolo | 2012 |              | 24 |
| <b>at_26</b> | Piacenza Lucia Giole       | Castagneto Carducci (LI)     | Frantoio, Leccino, Moraiolo | 2012 |              | 25 |
| <b>at_27</b> | Villa Magra                | Santa Luce (PI)              | Frantoio, Leccino, Moraiolo | 2012 |              | 26 |
| <b>at_28</b> | Sopra Le Vigne             | Calci (PI)                   | Frantoio, Leccino, Moraiolo | 2012 |              | 27 |
| <b>at_29</b> | Azienda Regionale Alberese | Alberese (GR)                | Blend                       | 2012 | Biologic oil | 28 |
| <b>ap_1a</b> | Azienda Agricola Buondioli | Carpino (FG)                 | Frantoio                    | 2012 | Monocultivar | 1  |

|              |                                    |                 |                             |  |      |              |
|--------------|------------------------------------|-----------------|-----------------------------|--|------|--------------|
|              | Azienda                            |                 |                             |  |      | 2            |
| <b>ap_1b</b> | Agricola<br>Buondioli              | Carpino (FG)    | Leccino                     |  | 2012 | Monocultivar |
|              | Azienda                            |                 |                             |  |      | 3            |
| <b>ap_2c</b> | Agricola<br>"D.Carbone"            | Toritto (BA)    | Blend                       |  | 2012 |              |
|              | Antica                             |                 |                             |  |      | 4            |
| <b>ap_3</b>  | Azienda<br>Agricola<br>Ricucci     | Rodi (FG)       | Garganco<br>Blend           |  | 2012 |              |
|              | Azienda                            |                 |                             |  |      | 5            |
| <b>ap_4a</b> | Agricola<br>"Cuonzo<br>Franco"     | Palombaio (BA)  | Ogliarola                   |  | 2012 | Monocultivar |
|              | Azienda                            |                 |                             |  |      | 6            |
| <b>ap_4b</b> | Agricola<br>"Cuonzo<br>Franco"     | Palombaio (BA)  | Coratina                    |  | 2012 | Monocultivar |
| <b>ap_5</b>  | Masseria<br>Chicco Rizzo           | Martignano (LE) | Cellina di Nardò, Ogliarola |  | 2012 |              |
|              | Cooperativa                        |                 |                             |  |      | 8            |
| <b>ap_6</b>  | Agricola<br>Olearia<br>Sannicolese | Sannicola (LE)  | Cellina di Nardò, Ogliarola |  | 2012 |              |
|              | Tenuta                             |                 |                             |  |      | 9            |
| <b>ap_7</b>  | Agricola<br>"Serra Cicora"         | Nardò (LE)      | Blend                       |  | 2012 |              |
| <b>ap_8b</b> | Agrié di Nicola<br>Santoro         | Cursi (LE)      | Cellina di Nardò, Ogliarola |  | 2012 |              |
| <b>ap_9a</b> | Conte                              | Sternatia (LE)  | Coratina                    |  | 2012 | Monocultivar |

|                    |                                  |                           |                             |      |                          |    |
|--------------------|----------------------------------|---------------------------|-----------------------------|------|--------------------------|----|
| <b>ap_9b</b>       | Conte                            | Sternatia (LE)            | Frantoio                    | 2012 | Monocultivar             | 12 |
| <b>ap_9c</b>       | Conte                            | Sternatia (LE)            | Picholine                   | 2012 | Monocultivar             | 13 |
| <b>ap_10</b>       | Agrosi                           | Supersano (LE)            | Blend                       | 2012 |                          | 14 |
| <b>ap_11</b>       | Terra del Sole                   | Rignano<br>Garganico (FG) | Blend                       | 2012 |                          | 15 |
| <b>ap_12a</b>      | Adamo                            | Alliste (LE)              | Cellina di Nardò, Ogliarola | 2012 |                          | 16 |
| <b>ap_12b</b>      | Adamo                            | Alliste (LE)              | Cellina di Nardò, Ogliarola | 2012 |                          | 17 |
| <b>ap_13a</b>      | Agricola<br>Nuova<br>Generazione | Martano (LE)              | Blend                       | 2012 | Mix green-ripe<br>olives | 18 |
| <b>ap_13b</b>      | Agricola<br>Nuova<br>Generazione | Martano (LE)              | Blend                       | 2012 | Green olives             | 19 |
| <b>ap_13c</b>      | Agricola<br>NuovaGenera<br>zione | Martano (LE)              | Blend                       | 2012 | mature                   | 20 |
| <b>ap_14a</b><br>3 | Agrinn                           | San Severo (FG)           | Blend                       | 2012 | silos III                | 21 |
| <b>ap_14b</b><br>1 | Agrinn                           | San Severo (FG)           | Blend                       | 2012 | Biologic oil,silos 1     | 22 |
| <b>ap_15</b>       | FrantoioSciropo                  | San Severo (FG)           | Peranzana                   | 2012 | Monocultivar             | 23 |
| <b>ap_16a</b>      | Macchia del<br>Barone            | Melendugno<br>(LE)        | Blend                       | 2012 |                          | 24 |
| <b>ap_16b</b>      | Macchia del<br>Barone            | Melendugno<br>(LE)        | Blend                       | 2012 |                          | 25 |
| <b>ap_16c</b>      | Macchia del<br>Barone            | Melendugno<br>(LE)        | Blend                       | 2012 |                          | 26 |

---

|               |                       |              |                             |      |              |    |
|---------------|-----------------------|--------------|-----------------------------|------|--------------|----|
| <b>ap_17</b>  | Bosco<br>delleVergini | Bitonto (BA) | Cima di Bitonto             | 2012 | Monocultivar | 27 |
| <b>ap_18</b>  | Olio Colella          | Corato (BA)  | Coratina                    | 2012 | Monocultivar | 28 |
| <b>ap_19a</b> | Alea                  | Martano (LE) | Ogliarola                   | 2012 | Monocultivar | 29 |
| <b>ap_19b</b> | Alea                  | Martano (LE) | Cellina di Nardò, Ogliarola | 2012 |              | 30 |
| <b>ap_19c</b> | Alea                  | Martano (LE) | Cellina di Nardò            | 2012 | Monocultivar | 31 |

---

## <sup>1</sup>H NMR DOSY EXPERIMENTAL DETAILS:

2D cross-peaks are displayed, where the centres of the cross-peaks correspond to the calculated diffusion constant. An example of 2D DOSY experiment is shown in **Figure S1**.

**Figure S1:** Example of a 2D DOSY <sup>1</sup>H NMR plot resulting from the experiment on the EVOO sample (*ap\_18*) acquired at T=298K.

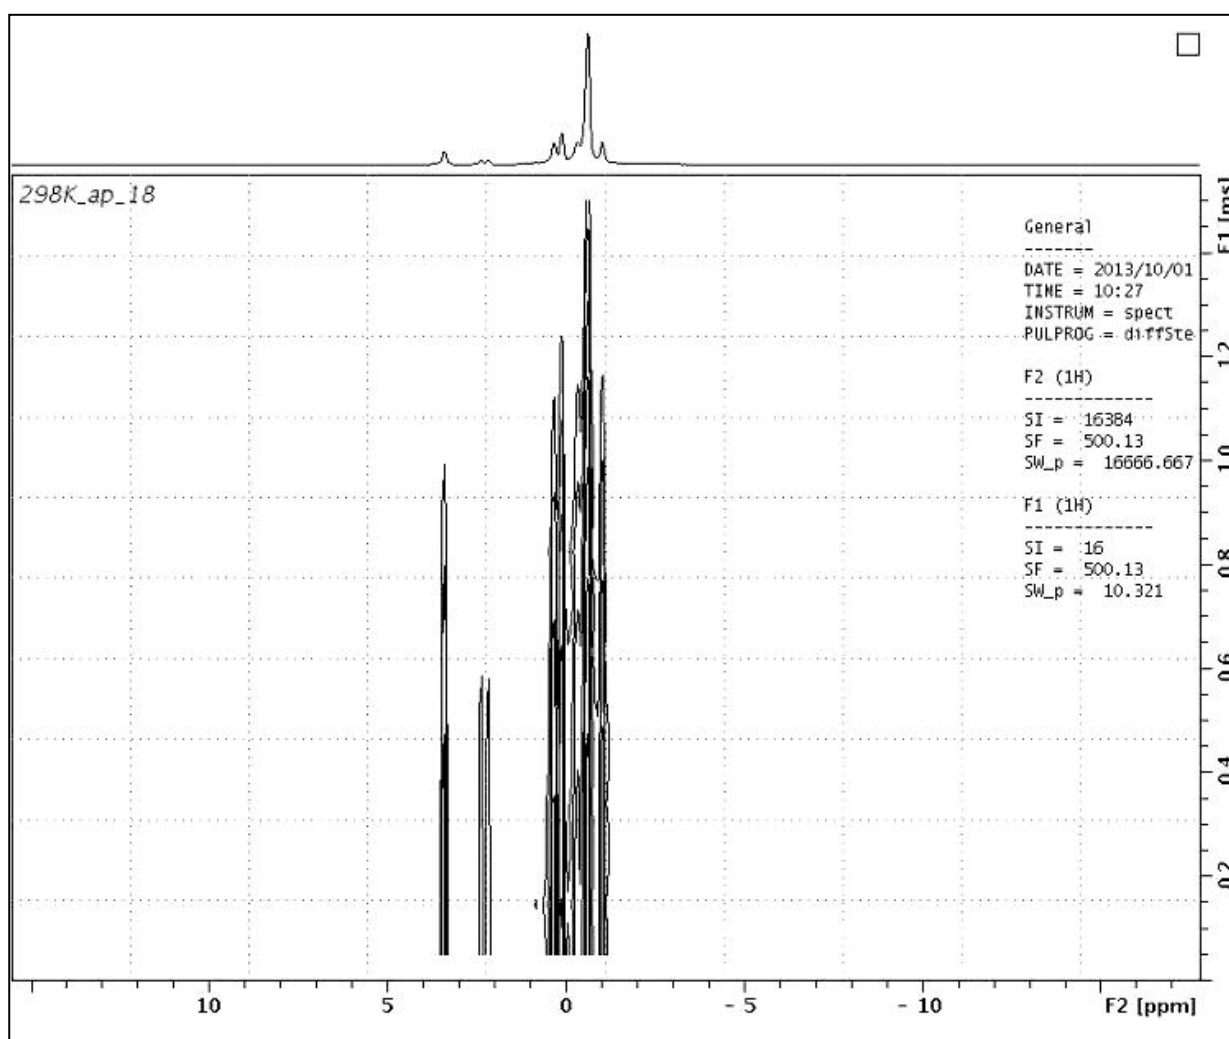

In **Figure S2** it is possible to see the <sup>1</sup>H NMR spectrum of the olive oil sample that shows the presence of nine peaks. Diffusion coefficients were calculated on four peaks indicated as 1, 3, 8 and 9.



Diffusion constant for the other peaks were not measured because their relatively low intensity under the optimised conditions for the applied NMR spin-echo sequence. In the main part of this research, for each oil sample, a single average value of diffusion coefficient,  $D$ , has been calculated as the average over the entire spectrum and these average values of the diffusion coefficient are reported and discussed in the Results and Discussion.

**Figure S2:**  $^1\text{H}$  NMR spectrum of the olive oil (*ap\_18*) acquired at  $T=298\text{K}$  at 500 MHz without any sample preparation.

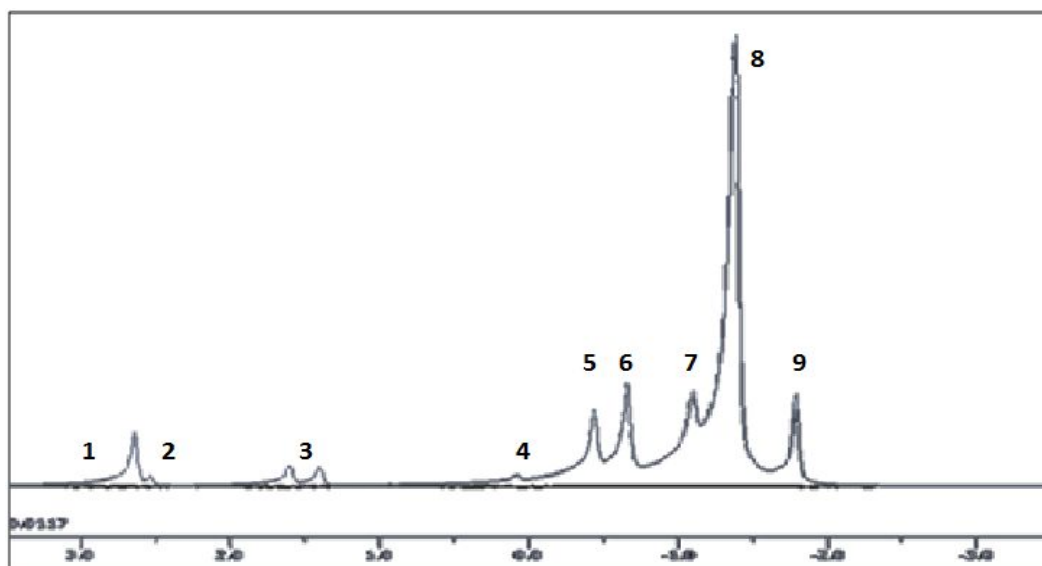

## Temperature dependence of Diffusion coefficients in Olive oil and Sunflower oil.

The self-diffusion constant in oils is temperature-dependent. **Figure S3** shows the temperature dependence for two oils, EVOO *ap\_14a3* and sunflower oil. As seen from the figure, both oils show similar temperature trends.

**Figure S3:** Temperature dependence of self-diffusion constant  $D$  for EVOO *ap14\_a3* (see Table S1) and sunflower oil (SuO), measured by means of  $^1\text{H}$  NMR DOSY technique. Dashed lines are data fits to an exponential function and serve as guides to an eye.

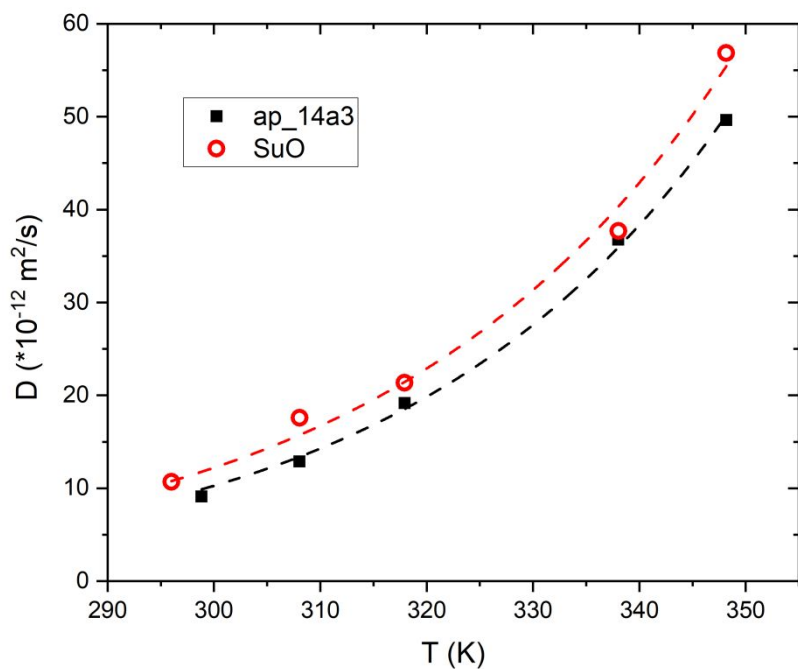

The self-diffusion constant is strictly connected with the viscosity parameter through the Stokes-Einstein equation. Assuming an Arrhenius-type relationship for viscosity, the temperature dependence of diffusion constant can be expressed as:

$$D = D_0 \cdot e^{-\frac{E_a}{RT}} \quad (\text{S1})$$

The values of activation energy of the self-diffusion process in the analysed oils could be estimated from **Figure S3** ( $E_a \sim 30.3$  kJ/mol for EVOO and  $E_a \sim 26.4$  kJ/mol for SuO). These values are in agreement with data found in the literature (A. Rachocki & J. Tritt-Goc, 2014).
